# Supplementary material for: Continuous Learning in Model‐Informed Precision Dosing: A Case Study in Pediatric Dosing of Vancomycin
Source: PubMed Central journal article supplement — Clin Pharmacol Ther. 2020 Nov 21;109(1):233–42. doi: 10.1002/cpt.2088 (PMC7839485; doi:10.1002/cpt.2088), 2020-11-21
Supplement: CPT-109-233-s002.pdf [file CPT-109-233-s002.pdf]

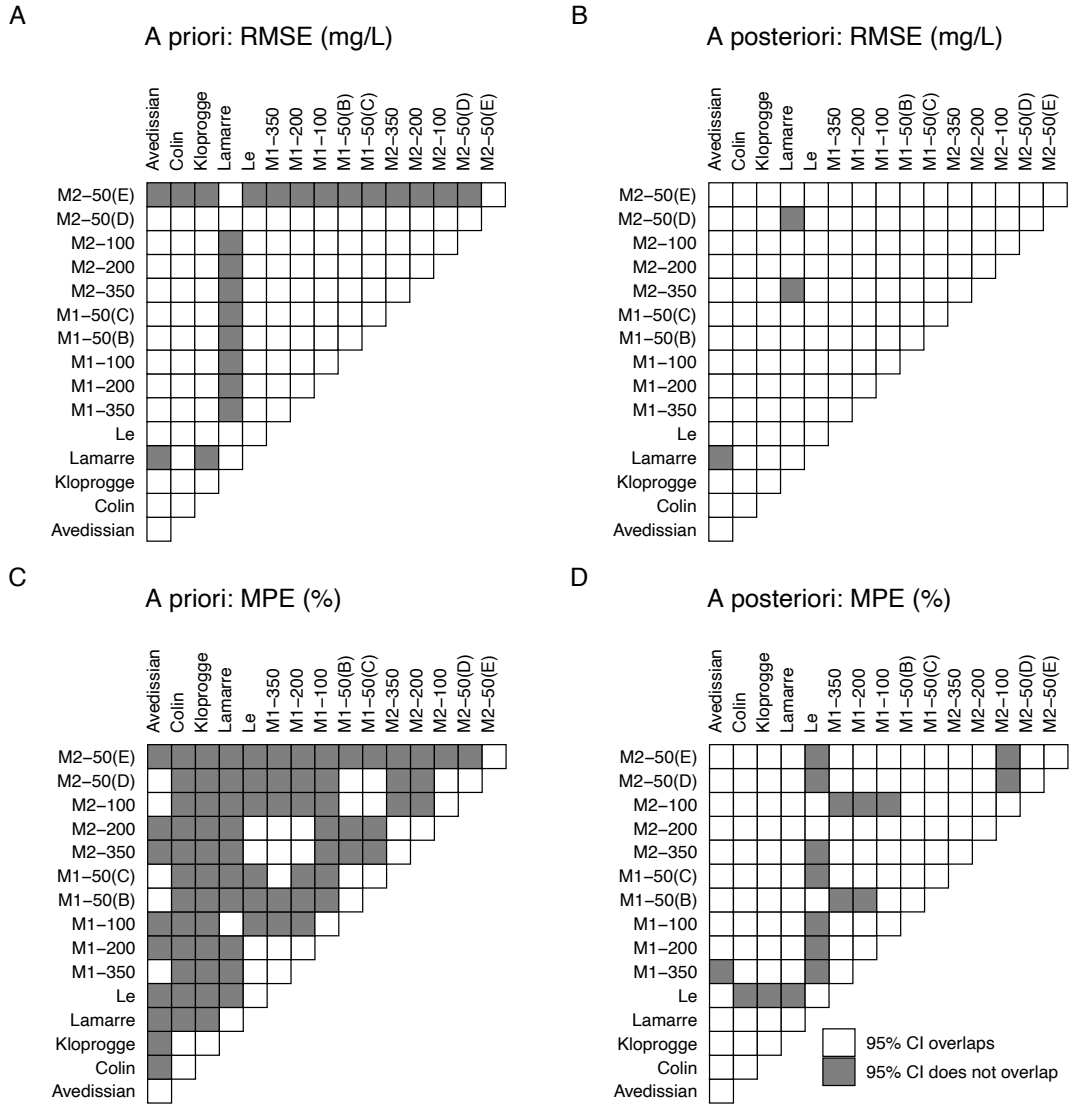

Figure S2: Cross-tables describing overlap of the 95% confidence intervals (CI) displayed in Figure 2. Grey squares indicate the 2.5th percentile of the bootstrapped RMSEs or MPEs for one model is higher than the 97.5th percentile of that quantity for the other model.
